# Supplementary material
Source: publisher figshare collection journal article supplement (https://karger.figshare.com/ndownloader/files/21438450)
Supplement: Supplementary file 1 [file 21438450]

**Supplementary Table 1. Numbers of patientsa with Charcot-Marie-Tooth disease by age at the end of each year in Korea, 2005–2018**

| Age, yr | 2005 | 2006 | 2007 | 2008 | 2009 | 2010 | 2011 | 2012 | 2013 | 2014 | 2015 | 2016 | 2017 | 2018 |
| --- | --- | --- | --- | --- | --- | --- | --- | --- | --- | --- | --- | --- | --- | --- |
| 0-4 | 5 | 8 | 16 | 17 | 15 | 14 | 14 | 11 | 7 | 14 | 12 | 14 | 16 | 16 |
| 5-9 | 14 | 26 | 36 | 48 | 49 | 45 | 45 | 47 | 43 | 40 | 41 | 39 | 36 | 34 |
| 10-14 | 25 | 50 | 72 | 69 | 71 | 76 | 84 | 83 | 91 | 88 | 91 | 86 | 101 | 90 |
| 15-19 | 13 | 37 | 58 | 91 | 110 | 132 | 159 | 160 | 146 | 148 | 140 | 152 | 157 | 163 |
| 20-24 | 17 | 41 | 70 | 88 | 100 | 108 | 130 | 152 | 188 | 200 | 224 | 250 | 255 | 263 |
| 25-29 | 15 | 36 | 65 | 83 | 106 | 112 | 118 | 136 | 151 | 158 | 168 | 186 | 215 | 258 |
| 30-34 | 12 | 35 | 50 | 71 | 87 | 101 | 110 | 121 | 132 | 168 | 177 | 180 | 210 | 213 |
| 35-39 | 14 | 29 | 46 | 66 | 76 | 86 | 101 | 111 | 127 | 122 | 140 | 166 | 191 | 219 |
| 40-44 | 12 | 30 | 47 | 71 | 89 | 96 | 111 | 122 | 128 | 147 | 150 | 162 | 180 | 182 |
| 45-49 | 15 | 60 | 77 | 83 | 88 | 90 | 95 | 110 | 131 | 158 | 167 | 187 | 191 | 215 |
| 50-54 | 9 | 43 | 58 | 83 | 111 | 132 | 155 | 159 | 155 | 152 | 159 | 159 | 180 | 204 |
| 55-59 | 13 | 49 | 56 | 73 | 88 | 95 | 115 | 138 | 162 | 175 | 203 | 218 | 235 | 241 |
| 60-64 | 16 | 33 | 46 | 59 | 73 | 85 | 94 | 96 | 105 | 121 | 133 | 170 | 195 | 217 |
| 65-69 | 15 | 51 | 64 | 64 | 65 | 53 | 54 | 65 | 79 | 92 | 109 | 123 | 125 | 137 |
| 70-74 | 10 | 35 | 38 | 53 | 53 | 62 | 64 | 73 | 71 | 71 | 70 | 71 | 87 | 101 |
| 75-80 | 6 | 12 | 17 | 24 | 35 | 38 | 38 | 39 | 50 | 49 | 61 | 63 | 78 | 76 |
| >80 | 0 | 5 | 9 | 12 | 15 | 17 | 21 | 26 | 29 | 36 | 39 | 48 | 49 | 62 |
| Total | 211 | 580 | 825 | 1,055 | 1,231 | 1,342 | 1,508 | 1,649 | 1,795 | 1,939 | 2,084 | 2,274 | 2,501 | 2,691 |

a Persons classified as having CMT were considered to have CMT from the time of identification until death.

**Supplementary Table 2. Causes of death among patients with Charcot-Marie-Tooth disease in Korea, 2005–2017**

|  | No. of observed deaths | | |  | No. of expected deaths | | | | |  | SMR (95% Cl) | | |
| --- | --- | --- | --- | --- | --- | --- | --- | --- | --- | --- | --- | --- | --- |
| Disease | Total | Male | Female |  | Total | | Male | | Female |  | Total | Male | Female |
| Total | 170 | 118 | 52 |  | 108.2 | | 74.3 | | 33.9 |  | **1.57**  **(1.34-1.83)** | **1.59**  **(1.31-1.90)** | **1.53**  **(1.14-2.01)** |
| Certain infectious and parasitic diseases (A00-B99) | 4 | 3 | 1 |  | 2.7 | | 1.9 | | 0.8 |  | 1.50  (0.41-3.84) | 1.61  (0.33-4.72) | 1.23  (0.03-6.86) |
| Neoplasms (C00-D48) | 42 | 30 | 12 |  | 33.8 | | 24.8 | | 9.0 |  | 1.24  (0.90-1.68) | 1.21  (0.82-1.73) | 1.33  (0.69-2.32) |
| Malignant neoplasm of stomach (C16) | 6 | 5 | 1 |  | 4.7 | | 3.6 | | 1.1 |  | 1.28  (0.47-2.79) | 1.41  (0.46-3.29) | 0.89  (0.02-4.94) |
| Malignant neoplasm of colon, rectosigmoid junction, rectum, anus, and anal canal (C18-C21) | 5 | 3 | 2 |  | 3.3 | | 2.2 | | 1.0 |  | 1.53  (0.50-3.57) | 1.35  (0.28-3.94) | 1.92  (0.23-6.94) |
| Malignant neoplasm of liver and intrahepatic bile ducts (C22) | 9 | 9 | 0 |  | 5.4 | | 4.4 | | 1.0 |  | 1.68  (0.77-3.19) | 2.06  (0.94-3.91) | - |
| Malignant neoplasm of trachea, bronchus, and lung (C33-C34) | 13 | 8 | 5 |  | 7.9 | | 6.5 | | 1.4 |  | 1.65  (0.88-2.83) | 1.23  (0.53-2.43) | 3.64  (1.18-8.50) |
| Endocrine, nutritional and metabolic diseases (E00-E90) | 8 | 8 | 0 |  | 5.1 | | 3.2 | | 1.9 |  | 1.58  (0.68-3.11) | **2.49**  **(1.07-4.90)** | - |
| Mental and behavioral disorders (F00-F99) | 3 | 3 | 0 |  | 1.8 | | 1.1 | | 0.7 |  | 1.68  (0.35-4.90) | 2.85  (0.59-8.34) | - |
| Diseases of the nervous system (G00-G99) | 35 | 27 | 8 |  | 2.6 | | 1.5 | | 1.1 |  | **13.32**  **(9.28-18.52)** | **17.46**  **(11.51-25.41)** | **7.39**  **(3.19-14.57)** |
| Diseases of the circulatory system (I00-I99) | 29 | 18 | 11 |  | 23.7 | | 14.8 | | 8.9 |  | 1.22  (0.82-1.76) | 1.21  (0.72-1.92) | 1.24  (0.62-2.22) |
| Diseases of the respiratory system (J00-J99) | 12 | 9 | 3 |  | 8.4 | | 6.1 | | 2.3 |  | 1.43  (0.74-2.50) | 1.48  (0.67-2.80) | 1.31  (0.27-3.83) |
| Diseases of the digestive system (K00-K93) | 7 | 5 | 2 |  | 5.0 | | 3.9 | | 1.1 |  | 1.40  (0.53-2.89) | 1.29  (0.42-3.01) | 1.79  (0.22-6.46) |
| Diseases of the musculoskeletal system and connective tissue (M00-M99) | 3 | 2 | 1 |  | 0.6 | | 0.3 | | 0.3 |  | 4.75  (0.98-13.89) | 7.10  (0.86-25.66) | 2.86  (0.07-15.93) |
| Diseases of the genitourinary system (N00-N99) | 3 | 1 | 2 |  | 2.0 | | 1.2 | | 0.8 |  | 1.51  (0.31-4.41) | 0.82  (0.02-4.55) | 2.62  (0.32-9.47) |
| External causes of morbidity and mortality (V01-Y98) | 11 | 7 | 4 |  | 13.0 | 10.0 | | 3.0 | |  | 0.85  (0.42-1.52) | 0.70  (0.28-1.45) | 1.34  (0.36-3.42) |
| Intentional self-harm  (X60 –X84) | 7 | 4 | 3 |  | 5.5 | 4.2 | | 1.3 | |  | 1.27  (0.51-2.61) | 0.95  (0.26-2.43) | 2.30  (0.47-6.73) |
| Others (D50-89, H00-H95, L00-L99, O00-O99, P00-P96, Q00-Q99, R00-R99) | 13 | 5 | 8 |  | 9.6 | 5.6 | | 4.0 | |  | 1.35  (0.72-2.32) | 0.90  (0.29-2.10) | 1.98  (0.86-3.90) |

SMR, standardized mortality ratio.
